# Supplementary material for: Dietary Patterns Are Associated with Cardiovascular and Cancer Mortality among Swiss Adults in a Census-Linked Cohort
Source: MDPI journal article supplement (doi:10.3390/nu10030313), 2018-03-07
Supplement: s1 [file s1]

# A

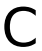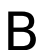D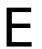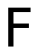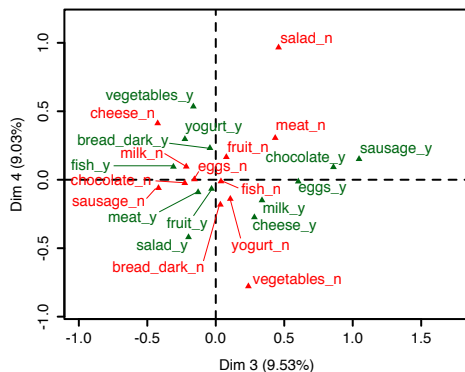

Figure S2

A

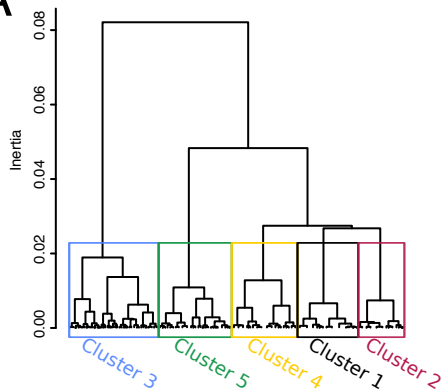

B

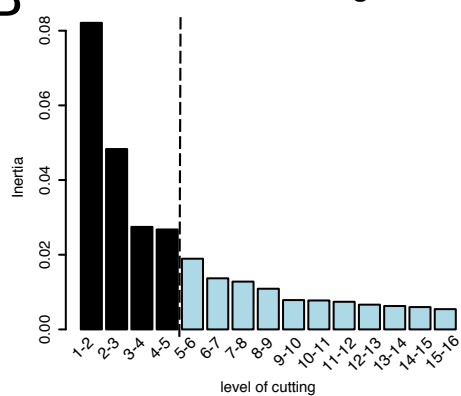

C

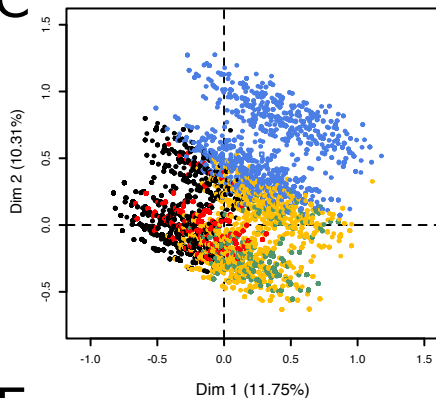

D

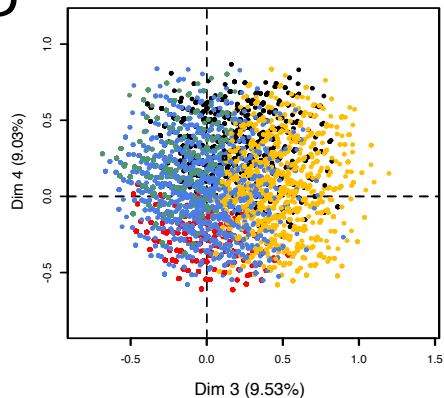

E

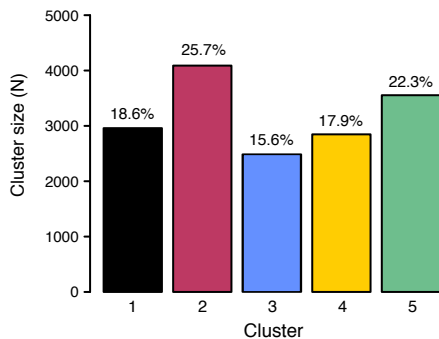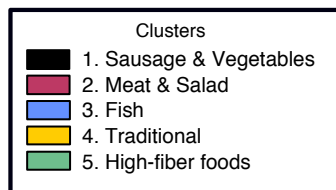

**Table S1:** Consumption of the 12 food groups among the study participants (number and percentage)

|            | <b>Overall</b> |      | <b>Females</b> |      | <b>Males</b> |      |
|------------|----------------|------|----------------|------|--------------|------|
|            | N              | %    | N              | %    | N            | %    |
| meat       | 12282          | 77.1 | 5990           | 73.6 | 6292         | 80.7 |
| fruit      | 11384          | 71.4 | 6381           | 78.4 | 5003         | 64.2 |
| salad      | 11111          | 69.7 | 5753           | 70.6 | 5358         | 68.8 |
| cheese     | 9574           | 60.1 | 4713           | 57.9 | 4861         | 62.4 |
| vegetables | 9445           | 59.3 | 4979           | 61.1 | 4466         | 57.3 |
| bread_dark | 7009           | 44.0 | 3828           | 47.0 | 3181         | 40.8 |
| milk       | 6213           | 39.0 | 3028           | 37.2 | 3185         | 40.9 |
| yogurt     | 5099           | 32.0 | 3079           | 37.8 | 2020         | 25.9 |
| sausage    | 4552           | 28.6 | 1975           | 24.3 | 2577         | 33.1 |
| chocolate  | 3323           | 20.9 | 1772           | 21.8 | 1551         | 19.9 |
| eggs       | 3276           | 20.6 | 1781           | 21.9 | 1495         | 19.2 |
| fish       | 1734           | 10.9 | 868            | 10.7 | 866          | 11.1 |

**Table S2:** Factor loadings of the first four dimensions of the multiple correspondence analysis<sup>1</sup>

| Dim. 1<br>"low vs. high variability" |       |       | Dim. 2<br>"meat vs. fish" |       |       | Dim. 3<br>"high energy vs. high fiber" |       |       | Dim. 4<br>"salad vs. vegetables" |       |       |
|--------------------------------------|-------|-------|---------------------------|-------|-------|----------------------------------------|-------|-------|----------------------------------|-------|-------|
|                                      | yes   | no    |                           | yes   | no    |                                        | yes   | no    |                                  | yes   | no    |
| fish                                 | 2.53  | -0.31 | fish                      | 5.98  | -0.73 | sausage                                | 3.39  | -1.35 | salad                            | -1.40 | 3.21  |
| fruit                                | 0.93  | -2.31 | meat                      | -1.09 | 3.67  | chocolate                              | 2.78  | -0.73 | vegetables                       | 1.78  | -2.59 |
| yogurt                               | 2.27  | -1.07 | fruit                     | -0.50 | 1.24  | eggs                                   | 1.95  | -0.50 | cheese                           | -0.91 | 1.37  |
| meat                                 | -0.65 | 2.19  | vegetables                | -0.82 | 1.19  | salad                                  | -0.64 | 1.48  | meat                             | -0.30 | 1.02  |
| eggs                                 | 1.96  | -0.51 | bread_dark                | -0.93 | 0.73  | meat                                   | -0.42 | 1.41  | yogurt                           | 0.99  | -0.47 |
| bread_dark                           | 1.68  | -1.32 | milk                      | -0.83 | 0.53  | cheese                                 | 0.91  | -1.37 | bread_dark                       | 0.77  | -0.61 |
| salad                                | 0.60  | -1.37 | yogurt                    | -0.78 | 0.37  | milk                                   | 1.09  | -0.70 | fruit                            |       | 0.55  |
| cheese                               | 0.70  | -1.05 | salad                     |       | 0.66  | fish                                   | -1.00 |       | sausage                          | 0.50  |       |
| chocolate                            | 0.82  |       | sausage                   | -0.66 |       | vegetables                             | -0.53 | 0.77  | milk                             | -0.50 | 0.32  |
| sausage                              | -0.69 |       | chocolate                 | -0.64 |       | yogurt                                 | -0.73 | 0.34  | fish                             | 0.32  |       |
| vegetables                           |       | -0.38 | cheese                    | -0.31 | 0.47  |                                        |       |       | chocolate                        | 0.31  |       |

<sup>1</sup>Factor loadings  $<|0.3|$  are not listed; food groups were ranked by the maximum of their „yes“ or „no“ loadings in each dimension; when none of the 2 factor loadings of a food group were  $<|0.3|$ , the food group was removed for clarity).

**Table S3:** Population Attributable Fractions: fractions of all-cause and disease-specific mortality attributable to low-variety dietary patterns.<sup>1</sup>

|                        | Overall                          |                                | Women                           |                           | Men                              |                                 |
|------------------------|----------------------------------|--------------------------------|---------------------------------|---------------------------|----------------------------------|---------------------------------|
|                        | Basic                            | Multivariable                  | Basic                           | Multivariable             | Basic                            | Multivariable                   |
| ALL CAUSE              | <b>8.76%</b><br>[6.00%, 11.52%]  | <b>3.26%</b><br>[0.46%, 6.09%] | 2.69%<br>[-0.97%, 6.42%]        | 0.17%<br>[-3.51%, 3.92%]  | <b>9.67%</b><br>[5.47%, 13.84%]  | <b>5.97%</b><br>[1.66%, 10.27%] |
| CARDIOVASCULAR DISEASE | <b>8.14%</b><br>[3.32%, 12.97%]  | 3.52%<br>[-1.39%, 8.47%]       | 0.91%<br>[-5.36%, 7.40%]        | -0.75%<br>[-7.08%, 5.84%] | <b>10.07%</b><br>[2.63%, 17.40%] | 7.57%<br>[-0.10%, 15.15%]       |
| CANCER                 | <b>11.19%</b><br>[6.51%, 15.89%] | <b>5.07%</b><br>[0.31%, 9.86%] | <b>6.49%</b><br>[0.15%, 12.99%] | 3.72%<br>[-2.65%, 10.29%] | <b>10.95%</b><br>[3.95%, 17.84%] | 5.83%<br>[-1.35%, 12.95%]       |
| OTHER CAUSES           | <b>6.42%</b><br>[1.55%, 11.32%]  | 1.01%<br>[-3.93%, 6.01%]       | 0.49%<br>[-5.78%, 7.00%]        | -2.34%<br>[-8.62%, 4.22%] | 7.10%<br>[-0.45%, 14.57%]        | 3.47%<br>[-4.26%, 11.16%]       |

<sup>1</sup> Values are PAFs [95% confidence intervals]. „Basic“ and „Multivariable“ indicate PAFs calculated on the basis of the proportional hazards Cox regression models adjusted for study (“Basic”) or for study, BMI, nationality, education, smoking status, alcohol consumption and physical activity (“Multivariable”).

**Table S4:** Rate of Advancement Periods: years of advancement in mortality rates due to low-variety dietary patterns<sup>1</sup>.

|                        | Overall                       |                               | Women                            |                                  | Men                           |                               |
|------------------------|-------------------------------|-------------------------------|----------------------------------|----------------------------------|-------------------------------|-------------------------------|
|                        | Basic                         | Multivariable                 | Basic                            | Multivariable                    | Basic                         | Multivariable                 |
| ALL CAUSE              | <b>1.89 y</b><br>[1.83, 1.94] | <b>0.70 y</b><br>[0.64, 0.75] | <b>0.58 y</b><br>[0.50, 0.67]    | 0.01 y<br>[-0.07, 0.10]          | <b>2.02 y</b><br>[1.94, 2.09] | <b>1.23 y</b><br>[1.15, 1.31] |
| CARDIOVASCULAR DISEASE | <b>1.29 y</b><br>[1.20, 1.39] | <b>0.55 y</b><br>[0.45, 0.64] | <b>0.20 y</b><br>[0.06, 0.33]    | -0.07 y<br>[-0.21, 0.07]         | <b>1.51 y</b><br>[1.39, 1.64] | <b>1.02 y</b><br>[0.89, 1.15] |
| CANCER                 | <b>3.68 y</b><br>[3.58, 3.77] | <b>1.60 y</b><br>[1.49, 1.69] | <b>2.57 y</b><br>[2.42, 2.72]    | <b>1.40 y</b><br>[1.25, 1.55]    | <b>3.04 y</b><br>[2.91, 3.17] | <b>1.66 y</b><br>[1.53, 1.79] |
| OTHER CAUSES           | <b>1.24 y</b><br>[1.14, 1.34] | <b>0.16 y</b><br>[0.06, 0.25] | <b>-0.15 y</b><br>[-0.30, -0.01] | <b>-0.72 y</b><br>[-0.86, -0.57] | <b>1.73 y</b><br>[1.60, 1.87] | <b>1.07 y</b><br>[0.93, 1.21] |

<sup>1</sup> Values are RAPs in years [95% confidence intervals]. „Basic“ and „Multivariable“ indicate RAPs calculated on the basis of the proportional hazards Cox regression models adjusted for study (“Basic”) or for study, BMI, nationality, education, smoking status, alcohol consumption and physical activity (“Multivariable”)
